# Supplementary material for: Reconstruction of Arctic sea ice thickness and its impact on sea ice forecasting in the melting season
Source: Copernicus journal article supplement (doi:10.5194/tc-2022-92), 2022-06-02
Supplement: Supplementary file [file tc-2022-92-AC2-supplement.pdf]

Author's point-to-point response on Referee Comment #2 to tc-2022-92. The reviewer comments appear in black. The responses are in blue and the proposed changes to manuscript are in *Arial*. L# refers to that in the track-changes file.

In this manuscript the authors present a statistically reconstructed dataset of Arctic summer sea ice thickness (SIT), which they create using SIT & SIC from the CMEMS Arctic reanalysis system, TOPAZ. The resulting SIT reconstruction, BRMT, is then compared with several model products, and thickness estimated by BGEP Eulerian moorings and IMB Lagrangian buoys. Finally, they BRMT dataset is assimilated into a short forecasting experiment for the period September 2011.

There are some interesting ideas and concepts here that are worthy of publication in The Cryosphere. However, there are some major issues that will need to be addressed before the manuscript can be published.

Thank you for your approval. We have carefully revised the issues in the manuscript in detail.

**Major comments/concerns:**

1. The quality of English language used throughout the manuscript leaves a lot to be desired. As well as reducing the overall readability of the paper, there are also several cases in which it is hard to understand what is being said (or why).

I'm very sorry for the bad reading experience. We made detailed modifications to the manuscript.

2. One of the main motivations listed for this study, and the BRMT dataset, is that summer satellite SIT data is not available. This issue is mentioned several times and the authors go so far as to state that it is "impossible". However, the authors do not take into account the fact that summer satellite SIT has been being developed now for many years. The first dataset of summer Arctic radar freeboard (10-years) was published at

the beginning of this year (Dawson et al., 2022). (NB. conversion from radar freeboard to SIT has also been done but that paper is still in press.)

I'm not necessarily saying that the existence of these new datasets invalidates the motivation for this study, but it should definitely be referenced and included in the discussion. How does/would the BRMT compare with the Dawson et al. (2022) freeboard?

Thanks for your suggestion. We ignored the latest research progress. All inappropriate expressions have been corrected in the revised manuscript. We tried to find the summer Arctic radar freeboard dataset online, but we couldn't find it. On July 28, 2022, we contacted Dawson and asked whether the dataset had been publicly accessed. Professor Dawson replied that the Arctic summer sea ice freeboard data is not currently accessible online, but they are going to release a more comprehensive dataset with Arctic summer freeboard, thickness data etc. So, in the discussion in Chapter 6, we cited the research of Dawson et al. (2022) and pointed out that when the new summer sea ice thickness (SIT) data set is released, it will provide a more reliable reference for evaluating the quality of BRMT.

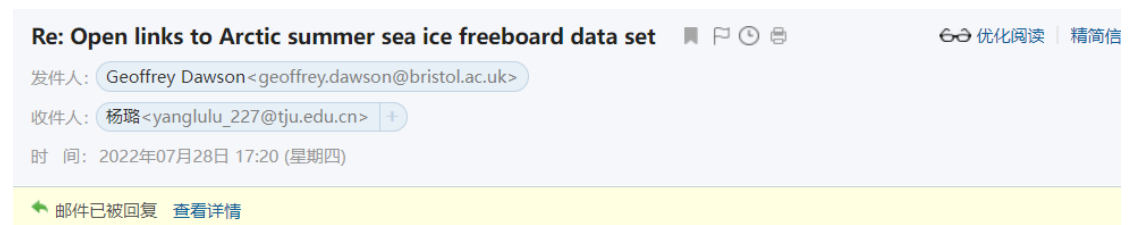

Hi Lu Yang,

Thanks for getting in touch. The Arctic summer sea ice freeboard data is not currently accessible online. However, we are going to release the freeboard and thickness data very shortly (in line with a paper that should be published in 2/3 weeks). This will be a more comprehensive dataset with the thickness conversion, errors etc, so it probably best to wait for this. When the data is available online, I will send you the link.

Kind regards

Geoffrey

**Figure 1.** The email reply of Dawson on whether the Arctic summer sea ice freeboard data is accessible online.

In addition, although the radar freeboard data are not available at present, in Figure 5 of Dawson et al. (2022), the author gives the diagrams of Cryosat-2 summer (May-September) radar freeboards for 2013 (hereinafter referred to as the reference figure). Since the longitude and latitude information of the reference figure cannot be obtained, we try to roughly plot the SIT of BRMT from July to September 2013 according to the geographical location of the reference figure. Here, according to the time period division of the reference figure, July to September is divided into six time periods, which are July 1<sup>st</sup>-15<sup>th</sup>, July 16<sup>th</sup>-31<sup>st</sup>, August 1<sup>st</sup>-15<sup>th</sup>, August 16<sup>th</sup>-31<sup>st</sup>, September 1<sup>st</sup>-15<sup>th</sup>, and September 16<sup>th</sup>-30<sup>th</sup>. The six Arctic SIT figures were processed into the same pixel size as the reference figures (Figure 2).

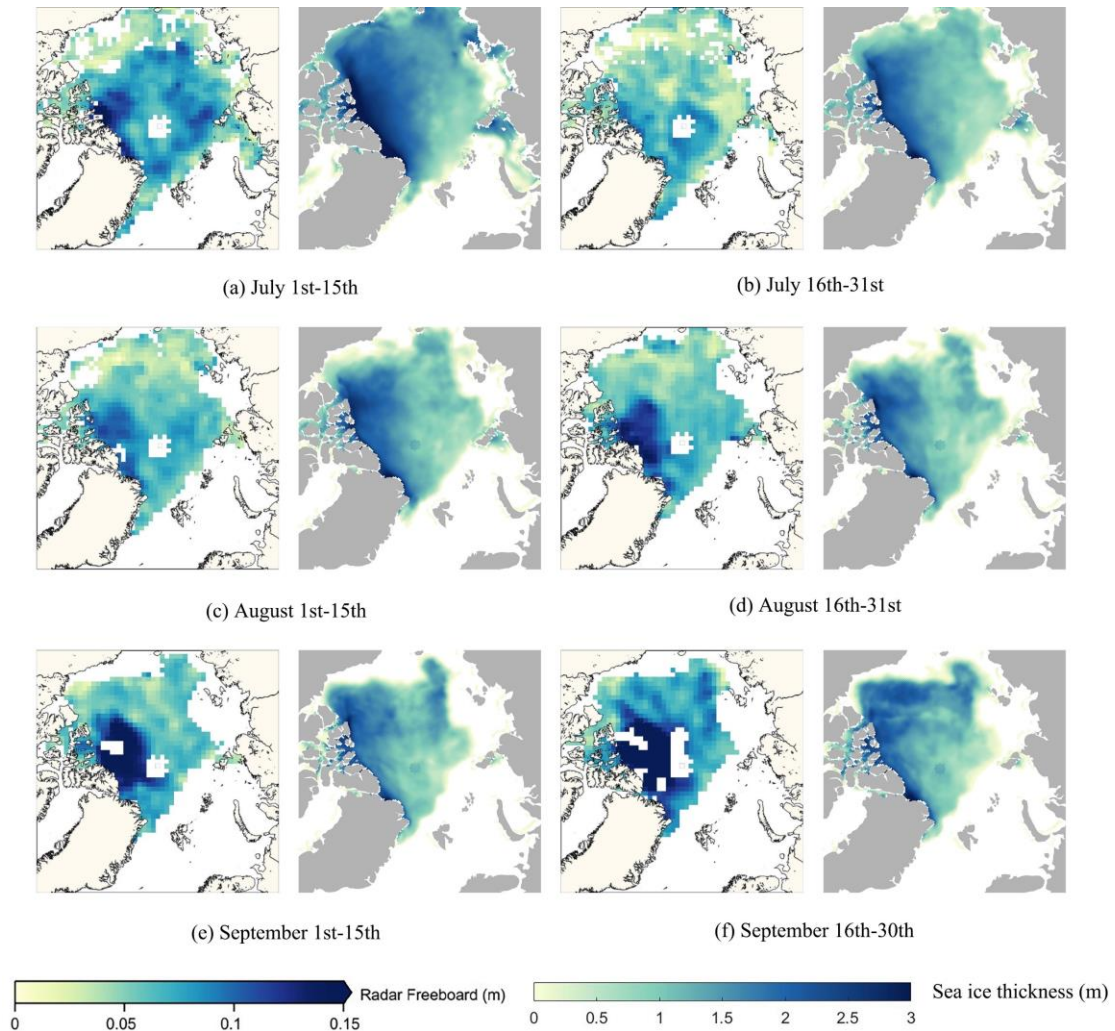

**Figure 2.** Arctic radar freeboard and sea ice thickness from July to September 2013, including six time periods: (a) July 1<sup>st</sup>-15<sup>th</sup>, (b) July 16<sup>th</sup>-31<sup>st</sup>, (c) August 1<sup>st</sup>-15<sup>th</sup>, (d) August 16<sup>th</sup>-31<sup>st</sup>, (e) September 1<sup>st</sup>-15<sup>th</sup>,

(f) September 16<sup>th</sup>-30<sup>th</sup>. In each group of figures, the left figure represents the radar freeboard from Dawson et al. (2022), and the right figure represents the sea ice thickness of BRMT.

It can be seen from Fig. 2 that the figures of both radar freeboard and SIT show that sea ice began to melt from the beginning of July until the sea ice extent reached the minimum in mid-September, and then gradually frozen. Although there is a strong correlation between radar freeboard and SIT, there are also some differences between them in the period of rapid change of sea ice melting and freezing. From mid-August to early September, the figures of radar freeboard show that although the sea ice extent was still shrinking, the sea ice gradually frozen from the north of the Canadian Arctic Archipelago, and the freezing extent extended to most areas of the Beaufort Sea by the end of September. However, the figures of SIT show that the sea ice had been melting from mid-August to early September. Until the mid-September, the sea ice in the Beaufort Sea showed obvious thickening, and the sea ice extent expanded accordingly. At present, we cannot obtain accurate summer radar freeboard or SIT data set covered Arctic, so it is difficult to properly compare between the radar freeboard from Cryosat-2 and the SIT from BRMT.

**Table 1.** The correlation coefficients, mean bias and standard deviation between CryoSat-2 / BRMT and ULS sea ice drafts for Moorings A, B and D, respectively.

|        | Correlation coefficients | The mean bias and standard deviation |
|--------|--------------------------|--------------------------------------|
| BGEP_A | 0.76 / 0.85              | -0.13±0.45m / 0.15±0.63m             |
| BGEP_B | 0.63 / 0.83              | -0.33±0.52m / 0.33±0.61m             |
| BGEP_D | 0.62 / 0.84              | -0.29±0.51m / 0.07±0.68m             |

In Dawson et al. (2022), the author converted Cryosat-2 radar freeboards to estimates of sea ice draft and compared it with Beaufort Gyre Exploration Programme Mooring ULS (Upward Looking Sonar). Table 1 shows the correlation coefficients, mean bias and standard deviation between CryoSat-2 (between May and September, 2011-2018), BRMT (between July and September, 2011-2015) and ULS sea ice drafts for Moorings

A, B and D, respectively. The results show that the standard deviation of Cryosat-2 is smaller than that of BRMT, but the correlation coefficient of BRMT is higher.

3. The paper manages to be both too long and detailed, and too short and vague at the same time. By this I mean that, despite the paper being rather long, sufficient details are not provided of the methods used to create BRMT. Given the length of the paper, I recommend that the authors consider dropping Section 5 and focusing properly on the BRMT reconstructed dataset – both creation and evaluation.

Thank you for your suggestion. The original intention of BRMT method is to provide sufficient SIT observation data to realize the correction of initial field in summer sea ice prediction. When carrying out real-time prediction, the reanalysis data set only has historical SIT data, which cannot meet the needs of real-time assimilation. However, the BRMT model only needs satellite observation of sea ice concentration (SIC) to estimate the SIT observation in real-time. Therefore, the forecast experiment in Section 5 is also to examine whether the forecast results of sea ice variables have improved when the assimilation of SIT from BRMT is introduced in addition to the assimilation of SIC. This provides strong evidence for the effectiveness of applying SIT from BRMT to real-time prediction. Considering the length of the paper, we only made a prediction for one month in a year. However, as you mentioned in Major comment 4, the forecast experiment results in more time periods are needed to fully illustrate the role of SIT from BRMT. Therefore, we have increased the period of forecast experiment. See the reply in Major comment 4 for the detailed results. At the same time, we have also modified the content of both creation and evaluation of BRMT. See the reply of Major comment 6 for the detailed results.

4. The “retrospective forecast experiments” in Section 5 are really only cursory, with less than one month of forecasts performed for only one particular year. To properly assess the impact of assimilating the BRMT SIT a much more comprehensive assessment would be needed – including the whole summer period on at least 2 different years. Many would also question the fact that BRMT uses information from the future

(i.e., 2012-2018) in the reconstruction. This makes it unusable for real-world forecasting situations. How much skill would be lost if you were to only use past data?

Thank you for your advice. Considering the refinement of the article and the fact that September is a period of rapid changes in Arctic sea ice melting and freezing, we still choose September for analysis in the “retrospective forecast experiments” in Section 5, and expand the time range to 2011-2013. In addition, according to the comment of Minor comment 3, we added the analysis of the prediction results of the sea ice extent. The adjusted Section 5 is divided into the forecast results of SIC, sea ice extent and SIT, respectively. The revised section is more logical and comprehensively evaluates the role of SIT from BRMT.

Thank you for your suggestions on the construction process of BRMT. In fact, Figure 2 in the manuscript just wants to show the algorithm flow of BRMT model. The specific selection of years in reanalysis data should be determined according to the target year of construction. But we did ignore that BRMT uses information from the future in the reconstruction. Therefore, we reconstructed the Arctic SIT from July to September in 2011-2015 based on BRMT model without using future information (excluding the future years in table A1 in the manuscript), named BRMTnew. The reanalysis data selected for different target years and the corresponding weights are shown in Table 2.

**Table 2.** The weights of certain years from 2004 to 2014 relative to 2011, 2012, 2013, 2014 and 2015, respectively. Cal\_year=The year used to calculate the weight. Tar\_year=Target year. Nan=None data.

| Tar_year \ Cal_year | 2011   | 2012   | 2013   | 2014   | 2015   |
|---------------------|--------|--------|--------|--------|--------|
| 2004                | 0.0312 | 0.0236 | 0.0183 | Nan    | Nan    |
| 2005                | 0.0448 | 0.0327 | 0.0247 | 0.0183 | Nan    |
| 2006                | 0.0676 | 0.0477 | 0.0350 | 0.0247 | 0.0183 |
| 2007                | 0.1036 | 0.0709 | 0.0507 | 0.0350 | 0.0247 |
| 2008                | 0.1587 | 0.1059 | 0.0739 | 0.0507 | 0.0350 |
| 2009                | 0.2399 | 0.1572 | 0.1075 | 0.0739 | 0.0507 |
| 2010                | 0.3543 | 0.2307 | 0.1555 | 0.1075 | 0.0739 |
| 2011                | Nan    | 0.3313 | 0.2223 | 0.1555 | 0.1075 |
| 2012                | Nan    | Nan    | 0.3123 | 0.2223 | 0.1555 |
| 2013                | Nan    | Nan    | Nan    | 0.3123 | 0.2223 |
| 2014                | Nan    | Nan    | Nan    | Nan    | 0.3123 |

Firstly, the qualitative comparison of error for the SIT from BRMT and BRMTnew relative to BGEP mooring facilities (BGEP\_A, BGEP\_B, BGEP\_D) is quantified. The details of RMSE and Bias in 2011-2015 are shown in Fig. 3. The results show that except for 2013A, 2013B, 2014A and 2015A, the differences of RMSE and bias between BRMT and BRMTnew are less than 0.05 m. In general, the average RMSE of BRMTnew is 0.0325 m more than that of BRMT, and the average Bias of BRMTnew is 0.0316 m larger than that of BRMT.

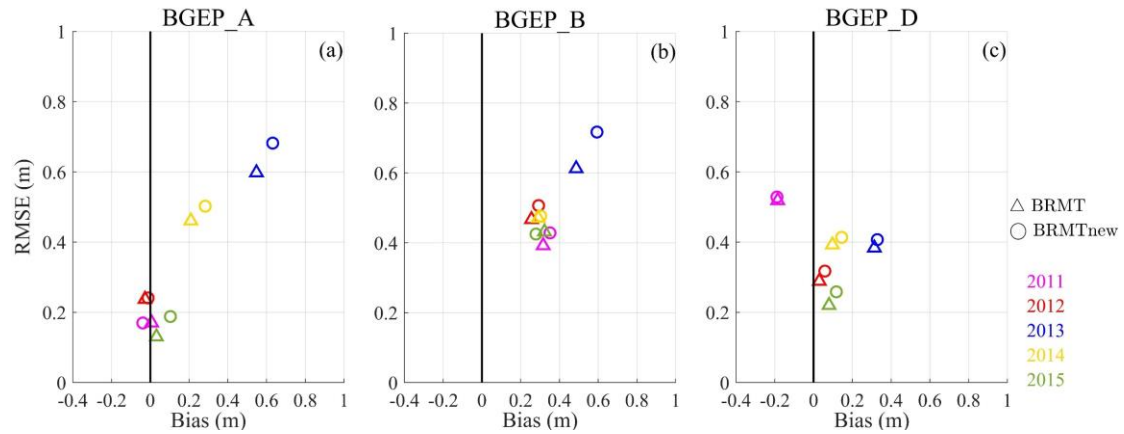

**Figure 3.** RMSE versus bias during melting season from 2011 to 2015 (marked in different colors) for BRMT ( $\Delta$ ) and BRMTnew ( $\circ$ ) relative to BGEP moorings BGEP\_A (a), BGEP\_B (b) and BGEP\_D (c).

Then, we calculated the correlation coefficient and normalized STD and CRMSD of the SIT of BRMT and BRMTnew relative to the IMB buoy data according to the Taylor chart index mentioned in Section 4.3 of the manuscript. In general, most of the points of BRMT and BRMTnew are concentrated in the range of NSTD and NCRMSD less than 6. We only show the results of this part here (Figure 4). The results show that the results of the two indicators are very close. The average values of NSTD, NCRMSD and correlation coefficient of BRMTnew are 1.797, 1.419 and 0.685 respectively, and BRMT is 1.802, 1.423 and 0.692 respectively. The conclusions are supplemented in Section 6.

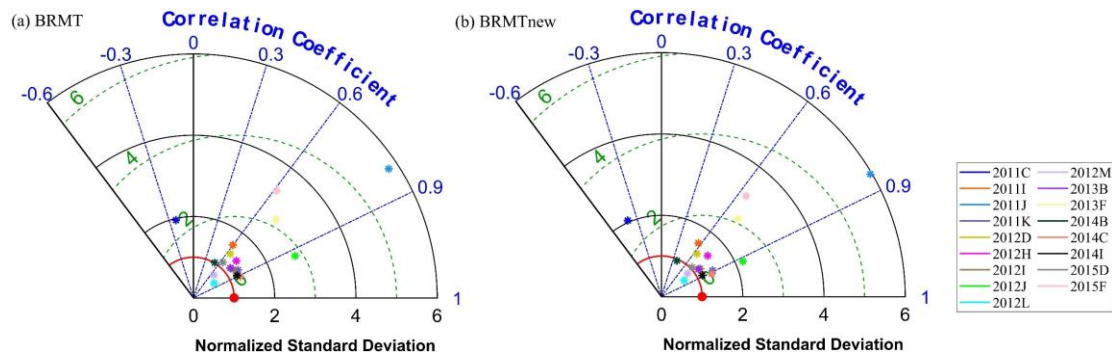

**Figure 4.** Taylor diagrams of (a) BRMT and (b) BRMTnew with respect to part of IMB buoy data during melting seasons from 2011 to 2015. The green dotted lines indicate the normalized CRMSD. The reference observations are indicated in red.

5. I struggle with the concept and motivation for the reconstructed SIT dataset. BRMT essentially uses the relationship between SIC and SIT in the TOPAZ reanalysis. Much of the motivation for using TOPAZ in this way is not included and so I am left with so many questions in my head: So why not just use TOPAZ? What extra is BRMT bringing to the table? Why do you trust the relationships in TOPAZ so much? How much difference would using a different reanalysis make to the SIT reconstruction? I'm also concerned that there is some horrible kind of circularity in the analysis here, whereby desired traits – such as the relationship between SIC & SIT – are included in the design of the system and then used as part of the evaluation.

Thank you very much. As mentioned in major comment 3, the original intention of BRMT is to apply it to real-time sea ice prediction. If TOPAZ is used in real-time forecast, it will be almost impossible to achieve. Because TOPAZ reanalysis data is only historical data, and it cannot provide real-time summer SIT. However, the BRMT model can estimate the summer SIT in real-time based on the SIC satellite remote sensing data and it can be expected to improve the initial field quality of sea ice prediction. In addition, the reason why TOPAZ reanalysis data is trusted to build the relationship between SIC and SIT is that TOPAZ reanalysis data is obtained by numerical model, and all variables are constrained by physical equations, so the relationship between SIC and SIT is in line with physical laws. If there is summer SIT observation data covering the Arctic in the future, we also hope to use the observation



data of SIC and SIT to build this relationship, which may make the SIT estimated by BRMT more accurate.

Of course, at present, other reanalysis data sets can also be considered in the BRMT model to build the relationship between SIC and SIT. In order to test the impact of using other reanalysis data sets, we selected the GLORYS12V1 data set (named GLOBAL\_MULTIYEAR\_PHY\_001\_030, [https://resources.marine.copernicus.eu/product-detail/GLOBAL\\_MULTIYEAR\\_PHY\\_001\\_030/INFORMATION](https://resources.marine.copernicus.eu/product-detail/GLOBAL_MULTIYEAR_PHY_001_030/INFORMATION)). This product is the CMEMS global ocean eddy-resolving (1/12° horizontal resolution, 50 vertical levels) reanalysis covering the altimetry (1993 onward). It is based largely on the current real-time global forecasting CMEMS system. The model component is the NEMO platform driven at surface by ECMWF ERA-Interim then ERA5 reanalyses for recent years. Observations are assimilated by means of a reduced-order Kalman filter. Along track altimeter data (sea level anomaly), satellite sea surface temperature, SIC and in situ temperature and salinity vertical profiles are jointly assimilated. Moreover, a 3D-VAR scheme provides a correction for the slowly-evolving large-scale biases in temperature and salinity.

Without using future information (as shown in Table 2), we reconstructed the Arctic SIT from July to September in 2011 to 2015 based on BRMT model and CMEMS reanalysis data, named BRMTcmems.

Firstly, the qualitative comparison of error for the SIT from BRMTnew (mentioned in Major comment 4) and BRMTcmems relative to BGEP mooring facilities (BGEP\_A, BGEP\_B, BGEP\_D) is quantified. The details of RMSE and Bias in 2011-2015 are shown in Fig. 5. The results show that except for 2011A, 2011B, 2011D, 2013D and 2014D, the differences of RMSEs and biases between BRMTnew and BRMTcmems are less than 0.2 m. In general, the average RMSE of BRMTcmems is 0.1734 m more than that of BRMTnew, and the average Bias of BRMTcmems is 0.2092 m larger than that of BRMTnew. In fact, there are obvious differences between the basic data sets (TOPAZ and CMEMS) used by the two and the BGEP mooring facilities (Figure 6). The difference of average RMSE between TOPAZ and CMEMS is about 0.3027 m,

and the difference of average bias is about 0.4147 m.

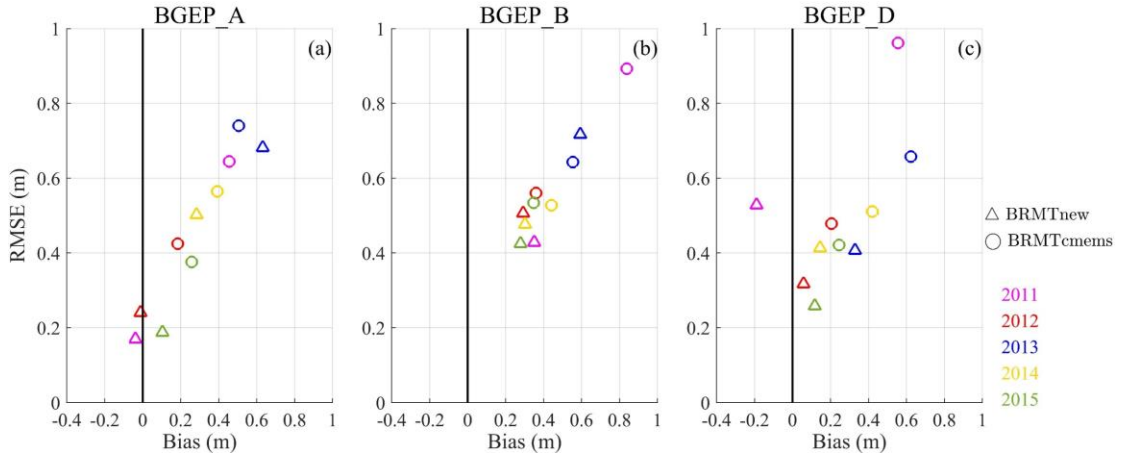

**Figure 5.** RMSE versus bias during melting season from 2011 to 2015 (marked in different colors) for BRMTnew ( $\Delta$ ) and BRMTcmems ( $\circ$ ) relative to BGEPA moorings BGEPA (a), BGEPB (b) and BGEPD (c).

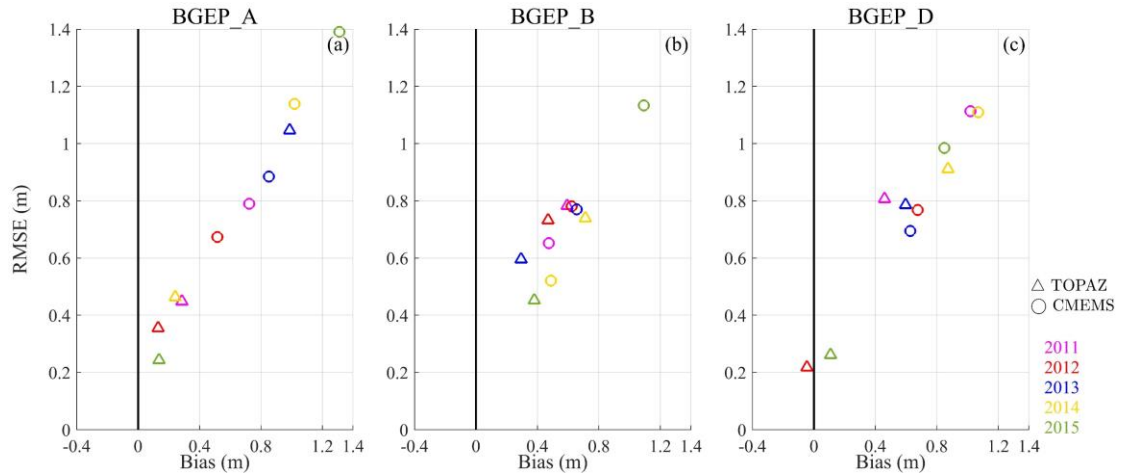

**Figure 6.** RMSE versus bias during melting season from 2011 to 2015 (marked in different colors) for TOPAZ ( $\Delta$ ) and CMEMS ( $\circ$ ) relative to BGEPA moorings BGEPA (a), BGEPB (b) and BGEPD (c).

Then, we calculated the correlation coefficient and normalized STD and CRMSD of the SIT of BRMTnew and BRMTcmems relative to the IMB buoy data according to the Taylor chart index mentioned in Section 4.3 of the manuscript. In general, most of the points of BRMTnew and BRMTcmems are concentrated in the range of NSTD and NCRMSD less than 5. We only show the results of this part in Fig. 7. The results show that the average NCRMSD of BRMTnew is smaller than that of BRMTcmems, which are 1.4197 and 1.5289, respectively. In addition, the average correlation coefficient of

BRMTnew is also higher than that of BRMTcmems, which are 0.6854 and 0.5188, respectively. However, the average NSTD of BRMTcmems is slightly smaller than that of BRMTnew, which is 1.7364 and 1.7971 respectively.

In conclusion, the selection of different reanalysis data sets has a certain impact on the reconstructed SIT. From the current results, TOPAZ is not a disappointed choice. The conclusions are supplemented in Section 6.

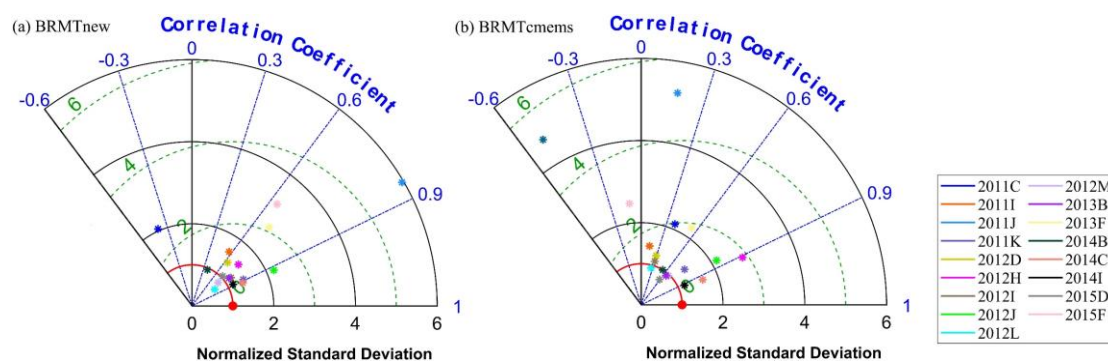

**Figure 6.** Taylor diagrams of (a) BRMTnew and (b) BRMTcmems with respect to part of IMB buoy data during melting seasons from 2011 to 2015. The green dotted lines indicate the normalized CRMSD. The reference observations are indicated in red.

In the forecast experiment, we design and verify the correlation between SIC and SIT forecast results, which is mainly based on the following considerations. If the quality of the sea ice initial field can be effectively improved by the SIT from BRMT, the forecast results between SIC and SIT of the forecast experiment jointly assimilating SIC and SIT (Exp\_SIC&SIT) should be more accurate than that of the forecast experiment assimilating only SIC (Exp\_SIC). Correspondingly, the correlation between SIC and SIT forecast results will be better in Exp\_SIC&SIT. It is inappropriate to simply attribute this result to the use of the correlation between SIC and SIT in BRMT. However, it must be admitted that we only select a short distance in section 5.2.3 to test the interaction between SIC and SIT, which is not comprehensive and persuasive. Because whether there is a high or low correlation between SIC and SIT in a certain range is closely related to whether the SIC is greater than 1 or less than 1. In other words, if the SIC is less than 1, the correlation may be relatively strong. If the SIC is

greater than 1, the correlation may be relatively weak. Therefore, based on the suggestions given by the reviewer, this section will be deleted in the revised manuscript.

6. The comparison of the model-based and reconstructed SIT observations with the in-situ observations is either not performed carefully enough or not described adequately. I am not convinced that these comparisons are being performed or interpreted correctly for the following reasons:

Thank you for your professional advice. In Section 4, we modified and supplemented the comparison of the model-based and reconstructed SIT with the in-situ observations in more details. In the revised manuscript, the description and discussion of this part are more rigorous than before.

1) The authors do not specify anywhere how they define Sea Ice Thickness (SIT). Is it the "floe thickness" (i.e., the average thickness of all the sea ice floes present in the grid-cell) or the "grid-box-mean thickness" (i.e., sea ice volume per unit grid-cell area)? The former is certainly what your point/in-situ observations (BGEP/IMB) are measuring. However, the latter is the prognostic used in the sea ice continuum models formulation and so very likely what you are using from the model-based products (TOPAZ/PIOMAS/GIOMAS/etc.). Obviously for  $SIC=1$  these definitions are the same but not for  $SIC<1$ . Another consideration is that if using the "grid-box-mean thickness" definition, SIT will likely be much more correlated with SIC than using the "floe thickness" definition.

Thanks for your advice. The SIT of BRMT is based on the relationship between SIC and SIT constructed by model product (TOPAZ4), so its definition should be "grid-box-mean thickness". The missing definition is supplemented in Section 3.1 of the revised manuscript. In addition, the in-situ SIT observation (BGEP and IMB) selected in the manuscript belongs to "floe thickness", which is different from the "grid-box-mean thickness" of BRMT (or PIOMAS/CMST/TOPAZ) when the SIC is less than 1. This difference in definition is also pointed out in Section 4.2 of the revised manuscript.

In addition, the compared analyses between SIT of each model and in-situ observation are also modified in Sections 4.2 and 4.3.

2) There is no discussion of how much one would expect agreement between the model and the in-situ observations. In particular the BGEP data are point observations (of ice draft converted to thickness) and are being compared with the modelled thickness in a large grid-cell. Even for the case SIC=1, when the SIT definition issue above is not present, a direct comparison is not obvious. The same is true for the IMBs which will only ever model a single floe. Furthermore there is no discussion of the sampling issues one would expect in the IMB dataset. The IMBs are of course Lagrangian in nature and are permanently attached to the same ice floe. So one would expect changes in thickness to be relatively slow, given that they are purely driven by thermodynamics. Meanwhile the dynamical nature of the Eulerian model could have huge changes in thickness from one time-step to the next. Finally, there are known sampling biases in the IMB dataset that should be discussed. IMBs are normally deployed just before the freeze-up in ice that has survived the summer. Mid-thickness floes are normally chosen – avoiding thick floes for practical reasons and thin floes to limit the chance of losing expensive equipment too quickly.

Thank you for pointing out the matters needing attention when comparing with the two in-situ observations (BGEP and IMB). Not only does the comparison of point observations and large grid-cell values exist in the SIT, but also in the ocean variables (such as temperature, salinity, sea surface height, etc.). In this case, the idea of data assimilation is usually adopted. The observation operator is used to project the model grid points onto the observation points, so that the model grid points become observable. In fact, the objective analysis method of Eq. 10 in the manuscript is essentially a data assimilation method, which processes the grid-cell SIT of BRMT (or CMST/PIOMAS/TOPAZ) into a value that can be compared with the SIT of observation point (BGEP/IMB). However, the difference between the two is unavoidable. The possible reasons include the error of the observation equipment itself, the error caused by the

simplification of the physical process of the model or the projection of grid points, and so on. Before there is no more suitable dataset of Arctic summer SIT that can be used for comparison, it is a common method compared with the SIT of point observations (Mu et al., 2018; Liang et al., 2019). This part of the discussion is supplemented in Section 4.2 of the revised manuscript. In addition, the discussion of changes in SIT caused by sampling issues in the IMB dataset is supplemented in Section 4.3. Further, the sampling biases in the IMB dataset are also discussed in Section 4.3.

### **Minor comments/concerns:**

1. In many cases results seem somewhat overstated. In particular the performance of BRMT in the East Greenland region, described as ‘outstanding’, is based upon comparison with only 2 IMB buoys – although the Lagrangian trajectory will include several individual measurements, they will only be of 2 individual ice floes! (NB. the same is true for the forecast results, which are based on only a few forecasts performed in a single year, but this is already mentioned above.)

Thanks for your advice. We indeed use inappropriate adjectives in some cases and it is not clear and accurate in the expression of some results. In the revised manuscript, we revised these issues. The problem of forecast results is modified in the manuscript and the reply is shown in Major comment 4.

2. Too little information is provided about the model/reanalysis products being used. In particular, what observations are assimilated and what surface forcing is being for the reanalyses. This applies for both the reanalyses datasets in Section 2 and the MITgcm model in Section 3.

Thank you for pointing this out. More information about the reanalysis data set in Section 2 and the MITgcm model in Section 3 is supplemented in the revised manuscript.

3. RMSE of SIC is not a very good metric for sea ice forecasts because of the errors in the passive microwave satellite observations. This is particularly true in the summer when the SSMIS cannot distinguish surface melting/ponds from open water. The SSMIS accuracy is also lower in areas of low concentration or thin ice. These points are the motivation for people using sea ice “extent” to compare with satellites.

In particular, I would drop the MIZ analysis in 5.2.1/Figure 15 because the SSMIS satellite is likely not able to resolve that. If you redid this analysis using AMSRE2 observations (which is higher resolution and more able to resolve thin/low concentration ice) then the results could be quite different.

Thanks for your suggestion. Although RMSE is not the best criteria to evaluate the forecast results of summer SIC, it is a relatively intuitive result. In Yang et al. (2015a, 2015b), the RMSE is calculated in summer (June-August) to compare the forecast results of the model and the SSMIS observation. In addition, SIC is one of the most important variables of sea ice, so we still intend to retain this part of the analysis. However, considering the low accuracy of SSMIS satellites in areas of low concentration or thin ice and the possibility that SSMIS may not be able to solve the problem of margin ice zones (MIZ), according to the opinions by the reviewer, is added and the MIZ analysis is deleted in the Section 5.2.1. In order to supplement the results of SIC, we added a new section to discuss the prediction results of sea ice extent (see Section 5.2.2 in the revised manuscript).

4. Some of the figures do not bring any useful information and so could either be removed or reformulated. For example, the data in Fig 13 can be understood easily from Fig 12b. Similarly, Fig 14, for which all the panels in look the same, could be improved by changing the model fields on the lower rows to be model-obs differences.

Thanks for your advice. We modified Fig. 12b. Now it shows differences between the RMSEs of SIC forecast results of Exp\_SIC and Exp\_SIC&SIT. The original Fig. 13 has also been modified, and the new Fig. 13 shows the difference between original Fig. 13a and Fig. 13b. Other figures with similar problems have also been modified.

### **Typos and technical comments**

I attach and annotated version of the original pdf with technical comments.

I do not highlight all instances where the English language needs to be improved only the cases where the language is unclear to the point that the scientific understanding is inhibited.



Thank you very much for your detailed comments. We carefully revised all the contents. Your comments are more profound for our understanding of SIT, which is of great help to us.

Dawson, G., Landy, J., Tsamados, M., Komarov, A. S., Howell, S., Heorton, H., Krumpen, T.: A 10-year record of Arctic summer sea ice freeboard from CryoSat-2, *Remote Sens. Environ.*, 268, 112744, <https://doi.org/10.1016/j.rse.2021.112744>, 2022.

Liang, X., Losch, M., Nerger, L., Mu, L., Yang, Q., & Liu, C.: Using sea surface temperature observations to constrain upper ocean properties in an Arctic sea ice-ocean data assimilation system, *J. Geophys. Res.-Oceans*, 124, 4727-4743, <https://doi.org/10.1029/2019JC015073>, 2019.

Mu, L., Losch, M., Yang, Q., Ricker, R., Losa, S. N., & Nerger, L.: Arctic-Wide sea ice thickness estimates from combining satellite remote sensing data and a dynamic ice-ocean model with data assimilation during the CryoSat-2 period, *J. Geophys. Res.-Oceans*, 123, 7763-7780, <https://doi.org/10.1029/2018JC014316>, 2018.

Yang, Q., Losa, S., Losch, M., Liu, J., Zhang, Z., Nerger, L., Yang, H.: Assimilating summer sea-ice concentration into a coupled ice-ocean model using a LSEIK filter. *Ann. Glaciol.*, 56, 38-44, <https://doi.org/10.3189/2015AoG69A740>, 2015a.

Yang, Q., Losa, S., Losch, M., Jung, T., Nerger, L.: The role of atmospheric uncertainty in Arctic summer sea ice data assimilation and prediction. *Q. J. R. Meteorol. Soc.*, 141: 2314-2323, <https://doi.org/10.1002/qj.2523>, 2015b.
